# Supplementary material
Source: Springer Nature journal article supplement (https://www.springermedizin.de/resource/supplementary/12936_2009_1002_MOESM1_ESM.pdf/9548754)
Supplement: MOESM1 [file 9548754]

**175 HIV-infected women**

**14 Excluded from study**

5 Non-singleton births  
9 Birth weight missing

**161 HIV-infected women enrolled  
into study**

**11 Excluded from full analysis**

10 Did not receive daily TS  
1 Missing data

**150 HIV-infected women  
included in analysis**

**387 HIV-uninfected women**

**31 Excluded from study**

5 Non-singleton births  
26 Birth weight missing

**356 HIV-uninfected women enrolled  
into study**

**20 Excluded from full analysis**

18 Did not receive SP  
2 Missing data

**336 HIV-uninfected women  
included in analysis**
